# Supplementary material for: GAGE is a method for identification of plant species based on whole genome analysis and genome editing
Source: PubMed Central journal article supplement (PMC9464240; doi:10.1038/s42003-022-03894-9), 2022-09-10
Supplement: 42003_2022_3894_MOESM2_ESM.pdf [file 42003_2022_3894_MOESM2_ESM.pdf]

# Supplementary Information

**Table S1. Off targets prediction of Cs\_target1 in the genomes of *Crocus sativus* and its three adulterants**

| Species                     | Number of mismatches |    |   |   |    |    |
|-----------------------------|----------------------|----|---|---|----|----|
|                             | 0                    | 1  | 2 | 3 | 4  | 5  |
| <i>Crocus sativus</i>       | 201                  | 13 | 8 | 0 | 4  | 61 |
| <i>Carthamus tinctorius</i> | 0                    | 0  | 0 | 0 | 0  | 17 |
| <i>Nelumbo nucifera</i>     | 0                    | 0  | 0 | 0 | 14 | 63 |
| <i>Zea mays</i>             | 0                    | 0  | 0 | 0 | 5  | 26 |

**Table S2. Mismatch sites of Cs\_target1 in the genome of *Crocus sativus***

| Chromosome        | Position  | Sequence (5'→3')           | Direction of strand | Number of mismatches |
|-------------------|-----------|----------------------------|---------------------|----------------------|
| chr1              | 365527282 | TTTGTGCCTACTCTtCGTGCCTTG   | -                   | 1                    |
| chr1              | 562319670 | TTTGTGCCTACTCTCCGTGCCTgG   | -                   | 1                    |
| chr1              | 945245496 | TTTGTGCCTACTCTtCGTGCCTTG   | -                   | 1                    |
| chr1              | 945453723 | TTTGTGCCTACTCTcGTGCCTTG    | -                   | 1                    |
| chr2              | 16933964  | TTTGTGCCTACTCTCCGTGCCTTc   | +                   | 1                    |
| chr2              | 9025836   | TTTGTGCCTACTCTCCGTGCCTcTG  | -                   | 1                    |
| chr3              | 729719    | TTTGTGCCTACTCTCCGcGTGCCTTG | -                   | 1                    |
| chr3              | 746190    | TTTGTGCCTACTCTCCGcGTGCCTTG | +                   | 1                    |
| chr6              | 208473188 | TTTGTGCCTACgCTCCGTGCCTTG   | +                   | 1                    |
| chr6              | 209771094 | TTTGTGCCTACgCTCCGTGCCTTG   | +                   | 1                    |
| chr8              | 127085844 | TTTGTGCCTACTCTCCGTGTCaTTG  | -                   | 1                    |
| chr8              | 65165634  | TTTGTGCCTACTCTtCGTGCCTTG   | +                   | 1                    |
| chr8              | 65184893  | TTTGTGCCTACTCTcGTGCCTTG    | +                   | 1                    |
| chr1              | 560187580 | TTTGTGCCTACTCTtCGTGCCTgG   | -                   | 2                    |
| chr2              | 50064681  | TTTGTGCCcACTCTCCGTGCCTTt   | +                   | 2                    |
| chr2              | 79230269  | TTTGTGCCcACTCTCCGTGCCTTt   | -                   | 2                    |
| chr3              | 518276986 | TTTGTGCCTACTCTCCGTGCCTgc   | -                   | 2                    |
| chr5              | 448736026 | TTTGTGCCTACTCTagGTGCCTTG   | +                   | 2                    |
| chr5              | 449535986 | TTTGTGCCTACTCTggGTGCCTTG   | +                   | 2                    |
| chr5              | 449948285 | TTTGTGCCTACTCTagGTGCCTTG   | -                   | 2                    |
| tig00095233_pilon | 187       | TTTGTGCCTACTCTCCGTGCCTgc   | -                   | 2                    |

The red and lowercase bases are the mismatch sites; tig00095233\_pilon is a scaffold that doesn't

assemble into chromosomes.

**Table S3. Targets located in the ITS2 region of five plants from different classes**

| Species                        | Target name | Target sequence           | Copy number |
|--------------------------------|-------------|---------------------------|-------------|
| <i>Ricinus communis</i>        | Rc_target1  | TTTCGATACATCGAGAGGGGGGCGG | 222         |
|                                | Rc_target2  | GCCTCGTGCATGCGGTTGGCCTAAA | 224         |
|                                | Rc_target3  | TCGGTGGTTGTAAGACTCTCTGAAA | 241         |
| <i>Setaria italica</i>         | Si_target1  | CGCCAAAAGACACTCCCAACCCAAA | 19          |
|                                | Si_target2  | TTTGGCTCCCCGTGCTGCAAGGCGC | 20          |
|                                | Si_target3  | TTTGGGCTGCCGGCATAACTTGTCG | 20          |
| <i>Ginkgo biloba</i>           | Gb_target1  | TGTCCCCGTGGCGCGGTTGACTAAA | 1           |
|                                | Gb_target2  | GAGCGTCTCCACGAACAACCTCAAA | 1           |
| <i>Alsophila spinulosa</i>     | As_target1  | GCGATGGTGCCACGGTCGGCTGAAA | 9           |
|                                | As_target2  | ACGTGCCTAGCCCGCTCGATCGAAA | 11          |
| <i>Selaginella tamariscina</i> | St_target1  | TTTGGCCGTCCGTGGTGTCTCTCC  | 23          |

**Table S4. List of plants used to verify Genome Analysis and Genome Editing (GAGE)**

| Class       | Family          | Species                        | Locality            | Resource type |
|-------------|-----------------|--------------------------------|---------------------|---------------|
| Angiosperms | Iridaceae       | <i>Crocus sativus</i>          | Dingzhou, Hebei     | Cultivated    |
| Angiosperms | Compositae      | <i>Carthamus tinctorius</i>    | Urumqi, Xinjiang    | Cultivated    |
| Angiosperms | Nelumbonaceae   | <i>Nelumbo nucifera</i>        | Beijing             | Cultivated    |
| Angiosperms | Euphorbiaceae   | <i>Ricinus communis</i>        | Qingyuan, Guangdong | Wild          |
| Angiosperms | Poaceae         | <i>Setaria italica</i>         | Suqian, Jiangsu     | Cultivated    |
| Angiosperms | Poaceae         | <i>Zea mays</i>                | Nanning, Guangxi    | Cultivated    |
| Gymnosperms | Ginkgoaceae     | <i>Ginkgo biloba</i>           | Beijing             | Cultivated    |
| Ferns       | Cyatheaceae     | <i>Alsophila spinulosa</i>     | Meishan, Sichuan    | Cultivated    |
| Lycophytes  | Selaginellaceae | <i>Selaginella tamariscina</i> | Nanning, Guangxi    | Cultivated    |

5'-GAGAGGAGAGAGGGGTGGGTGTGAATAAGGGGAAGAGGGGGAGAGGAGGG-3'

**Fig. S1. The nucleotide sequence for 50 bp ssDNA reporter<sup>1</sup>**

## Supplementary References

1. Bonini, A. et al. A label-free impedance biosensing assay based on CRISPR/Cas12a collateral activity for bacterial DNA detection. *J. Pharmaceut. Biomed.* **204**, 114268 (2021).
