# Supplementary material for: GAGE is a method for identification of plant species based on whole genome analysis and genome editing
Source: PubMed Central journal article supplement (PMC9464240; doi:10.1038/s42003-022-03894-9), 2022-09-10
Supplement: 42003_2022_3894_MOESM3_ESM.pdf [file 42003_2022_3894_MOESM3_ESM.pdf]

## Description of Additional Supplementary Files

**File name:** Supplementary Data 1

**Description:** The source data behind the graphs in the paper.
